# Supplementary material
Source: publisher site journal article supplement (https://www.spandidos-publications.com/7890/downloadSupplementary)
Supplement: Supplementary file 1 [file downloadSupplementary]

**Table SI.** Baseline profiles of the cohort used in the present study.

| <b>Traits</b>    | <b>Total sample size</b> | <b>Number of cases</b> | <b>Number of controls</b> | <b>Total number of SNPs</b> | <b>Population</b> |
|------------------|--------------------------|------------------------|---------------------------|-----------------------------|-------------------|
| Uterine fibroids | 258,718                  | 21,024                 | 237,694                   | 24,129,853                  | European          |
| Knee OA          | 403,124                  | 24,955                 | 378,169                   | 29,999,696                  | European          |
| Hip OA           | 393,873                  | 15,704                 | 378,169                   | 29,771,219                  | European          |

SNP, single nucleotide polymorphism; OA, osteoarthritis.

**Table SII.** Characteristics of SNPs used as genetic instruments in UF and hOA.

| Exp | SNP         | Chr | Position    | Closest gene  | EA | NEA | EAF  | $\beta$ | SE   | P-value                | F    | Confounder |
|-----|-------------|-----|-------------|---------------|----|-----|------|---------|------|------------------------|------|------------|
| UF  | rs10069690  | 5   | 1,279,790   | TERT          | T  | C   | 0.26 | 0.12    | 0.01 | $1.79 \times 10^{-34}$ | 1442 |            |
| UF  | rs1045405   | 11  | 252,733     | PSMD13        | C  | T   | 0.15 | 0.08    | 0.01 | $2.07 \times 10^{-09}$ | 423  |            |
| UF  | rs10794695  | 4   | 70,566,583  | AC112518.3    | A  | T   | 0.52 | 0.08    | 0.01 | $1.23 \times 10^{-21}$ | 829  |            |
| UF  | rs10815717  | 9   | 801,571     | DMRT1         | A  | G   | 0.50 | 0.08    | 0.01 | $6.76 \times 10^{-18}$ | 831  |            |
| UF  | rs10947616  | 6   | 36,620,499  | TBC1D22B      | G  | C   | 0.27 | -0.07   | 0.01 | $5.86 \times 10^{-13}$ | 501  |            |
| UF  | rs11008551  | 10  | 31,913,890  | GLUDP5        | T  | G   | 0.20 | -0.06   | 0.01 | $3.03 \times 10^{-08}$ | 298  |            |
| UF  | rs117245733 | 13  | 40,723,944  | LINC00598     | A  | G   | 0.02 | 0.38    | 0.04 | $6.12 \times 10^{-24}$ | 1473 |            |
| UF  | rs11786929  | 8   | 130,479,731 | CCDC26        | C  | T   | 0.37 | 0.05    | 0.01 | $1.53 \times 10^{-09}$ | 302  |            |
| UF  | rs11887109  | 2   | 100,045,184 | REV1          | G  | A   | 0.53 | 0.06    | 0.01 | $1.56 \times 10^{-11}$ | 465  |            |
| UF  | rs12479436  | 2   | 11,666,339  | GREB1         | G  | T   | 0.59 | 0.08    | 0.01 | $8.06 \times 10^{-22}$ | 804  |            |
| UF  | rs12674731  | 8   | 30,175,381  | CTD-3107M8.1  | C  | A   | 0.27 | 0.06    | 0.01 | $1.49 \times 10^{-09}$ | 368  |            |
| UF  | rs12902948  | 15  | 7,784,9254  | RP11-307C19.2 | C  | T   | 0.28 | -0.06   | 0.01 | $3.50 \times 10^{-10}$ | 376  |            |
| UF  | rs149934734 | 11  | 108,315,606 | C11orf65      | T  | C   | 0.02 | 0.35    | 0.04 | $4.77 \times 10^{-17}$ | 1248 |            |
| UF  | rs1506869   | 8   | 25,269,102  | DOCK5         | A  | C   | 0.33 | -0.05   | 0.01 | $1.02 \times 10^{-08}$ | 286  |            |
| UF  | rs16991615  | 20  | 5,948,227   | MCM8          | A  | G   | 0.05 | 0.15    | 0.03 | $4.30 \times 10^{-08}$ | 554  |            |
| UF  | rs17033114  | 12  | 103,123,339 | LINC00485     | C  | T   | 0.13 | -0.13   | 0.01 | $7.35 \times 10^{-20}$ | 993  |            |
| UF  | rs17116149  | 10  | 105688050   | STN1          | A  | G   | 0.04 | 0.27    | 0.02 | $1.83 \times 10^{-42}$ | 1457 |            |
| UF  | rs17631680  | 2   | 67,090,367  | AC009474.2    | C  | T   | 0.10 | -0.1    | 0.02 | $5.14 \times 10^{-09}$ | 467  |            |
| UF  | rs2131371   | 12  | 46,796,522  | RP11-96H19.1  | C  | A   | 0.73 | 0.08    | 0.01 | $1.20 \times 10^{-13}$ | 654  |            |
| UF  | rs2207548   | 11  | 32,368,744  | THEM7P        | A  | C   | 0.32 | 0.1     | 0.01 | $1.38 \times 10^{-23}$ | 1131 |            |

|     |            |    |             |               |   |   |      |       |      |                        |      |                                                         |
|-----|------------|----|-------------|---------------|---|---|------|-------|------|------------------------|------|---------------------------------------------------------|
| UF  | rs2270206  | 7  | 116,913,567 | WNT2          | A | C | 0.20 | 0.06  | 0.01 | $2.83 \times 10^{-08}$ | 298  |                                                         |
| UF  | rs2277339  | 12 | 57,146,069  | PRIM1         | G | T | 0.13 | -0.08 | 0.01 | $3.12 \times 10^{-11}$ | 375  |                                                         |
| UF  | rs2293607  | 3  | 169,482,335 | ACTRT3        | C | T | 0.34 | -0.08 | 0.01 | $1.61 \times 10^{-19}$ | 745  |                                                         |
| UF  | rs2306022  | 15 | 68,628,163  | ITGA11        | T | C | 0.09 | 0.11  | 0.02 | $3.89 \times 10^{-13}$ | 514  |                                                         |
| UF  | rs2413620  | 22 | 4,066,8988  | TNRC6B        | G | C | 0.26 | 0.1   | 0.01 | $4.35 \times 10^{-27}$ | 999  |                                                         |
| UF  | rs2553773  | 11 | 35,083,633  | PDHX          | G | C | 0.61 | 0.07  | 0.01 | $6.13 \times 10^{-14}$ | 605  | Total bone mineral density in the body <sup>a</sup> (-) |
| UF  | rs28508285 | 9  | 92,254,897  | UNQ6494       | G | A | 0.18 | 0.07  | 0.01 | $4.22 \times 10^{-11}$ | 375  |                                                         |
| UF  | rs34242502 | 17 | 12,561,985  | MYOCD         | A | G | 0.43 | 0.07  | 0.01 | $6.57 \times 10^{-11}$ | 623  |                                                         |
| UF  | rs34933909 | 5  | 176,465,270 | ZNF346        | T | G | 0.46 | 0.09  | 0.02 | $1.44 \times 10^{-09}$ | 1045 |                                                         |
| UF  | rs377807   | X  | 131,422,434 | -             | C | T | 0.24 | 0.14  | 0.01 | $3.00 \times 10^{-34}$ | 1863 | (-) <sup>b</sup>                                        |
| UF  | rs3804984  | 3  | 4,716,214   | ITPR1         | C | T | 0.47 | -0.06 | 0.01 | $1.89 \times 10^{-11}$ | 465  |                                                         |
| UF  | rs3820282  | 1  | 22,468,215  | WNT4          | T | C | 0.25 | 0.15  | 0.01 | $4.06 \times 10^{-52}$ | 2201 |                                                         |
| UF  | rs41308088 | 20 | 62,293,118  | RTEL1         | T | C | 0.08 | 0.12  | 0.02 | $1.15 \times 10^{-09}$ | 550  |                                                         |
| UF  | rs4858590  | 3  | 2,426,0363  | THRB          | T | C | 0.43 | 0.06  | 0.01 | $1.44 \times 10^{-10}$ | 457  |                                                         |
| UF  | rs547904   | 3  | 8,947,601   | RAD18         | G | A | 0.66 | 0.05  | 0.01 | $4.86 \times 10^{-08}$ | 291  |                                                         |
| UF  | rs56263516 | 6  | 31,413,707  | LINC01149     | G | T | 0.14 | 0.07  | 0.01 | $4.20 \times 10^{-08}$ | 306  | Ankylosing spondylitis <sup>a</sup>                     |
| (-) |            |    |             |               |   |   |      |       |      |                        |      |                                                         |
| UF  | rs58415480 | 6  | 1,525,62271 | SYNE1         | G | C | 0.18 | 0.2   | 0.01 | $7.48 \times 10^{-46}$ | 3091 |                                                         |
| UF  | rs62323681 | 4  | 54,548,347  | RP11-231C18.3 | G | A | 0.06 | 0.16  | 0.02 | $3.43 \times 10^{-12}$ | 749  |                                                         |
| UF  | rs6500282  | 16 | 50,138,100  | HEATR3        | C | A | 0.70 | 0.07  | 0.01 | $1.96 \times 10^{-12}$ | 534  |                                                         |
| UF  | rs6903575  | 6  | 74,503,730  | CD109         | A | G | 0.50 | -0.06 | 0.01 | $4.50 \times 10^{-13}$ | 467  |                                                         |
| UF  | rs7043754  | 9  | 630,424     | KANK1         | A | G | 0.44 | -0.05 | 0.01 | $4.75 \times 10^{-10}$ | 319  |                                                         |
| UF  | rs7318389  | 13 | 40,829,568  | LINC00598     | C | T | 0.20 | 0.06  | 0.01 | $1.57 \times 10^{-08}$ | 298  |                                                         |
| UF  | rs73392700 | 11 | 224,845     | SIRT3         | C | G | 0.06 | -0.27 | 0.02 | $4.59 \times 10^{-53}$ | 2145 |                                                         |
| UF  | rs77687125 | 2  | 242,652,848 | ING5          | T | C | 0.40 | 0.07  | 0.01 | $7.57 \times 10^{-09}$ | 610  |                                                         |
| UF  | rs78378222 | 17 | 7,571,752   | TP53          | G | T | 0.01 | 0.82  | 0.05 | $3.95 \times 10^{-63}$ | 3491 |                                                         |

|     |             |    |             |              |    |   |      |       |      |                        |      |                              |
|-----|-------------|----|-------------|--------------|----|---|------|-------|------|------------------------|------|------------------------------|
| UF  | rs7841047   | 8  | 7,126,5978  | NCOA2        | A  | G | 0.25 | 0.07  | 0.01 | 1.96x10 <sup>-10</sup> | 476  |                              |
| UF  | rs8105767   | 19 | 22,215,441  | AC003973.4   | G  | A | 0.31 | 0.05  | 0.01 | 4.97x10 <sup>-08</sup> | 277  |                              |
| UF  | rs9532432   | 13 | 40,352,602  | COG6         | A  | T | 0.42 | -0.05 | 0.01 | 3.43x10 <sup>-08</sup> | 316  |                              |
| UF  | rs9549260   | 13 | 41,254,104  | FOXO1        | A  | C | 0.28 | 0.06  | 0.01 | 1.53x10 <sup>-09</sup> | 376  |                              |
| hOA | rs10492367  | 12 | 28,014,970  | RN7SKP15     | T  | G | 0.19 | 0.15  | 0.01 | 1.25x10 <sup>-24</sup> | 2747 |                              |
| hOA | rs10896015  | 11 | 65,323,725  | LTBP3        | A  | G | 0.27 | -0.08 | 0.01 | 2.74x10 <sup>-09</sup> | 996  |                              |
| hOA | rs11059094  | 12 | 122,606,837 | MLXIP        | T  | C | 0.48 | 0.08  | 0.01 | 7.38x10 <sup>-11</sup> | 1262 |                              |
| hOA | rs115740542 | 6  | 26,123,502  | HIST1H2BC    | C  | T | 0.07 | 0.13  | 0.02 | 1.60x10 <sup>-08</sup> | 869  |                              |
| hOA | rs11583641  | 1  | 183,906,245 | COLGALT2     | T  | C | 0.28 | -0.08 | 0.01 | 5.57x10 <sup>-10</sup> | 1019 |                              |
| hOA | rs12040949  | 1  | 150,447,462 | RPRD2        | T  | C | 0.38 | -0.07 | 0.01 | 2.83x10 <sup>-08</sup> | 912  |                              |
| hOA | rs12209223  | 6  | 76,164,589  | FILIP1       | A  | C | 0.1  | 0.16  | 0.02 | 3.88x10 <sup>-16</sup> | 1823 |                              |
| hOA | rs12901372  | 15 | 67,370,506  | SMAD3        | G  | C | 0.47 | -0.08 | 0.01 | 3.46x10 <sup>-11</sup> | 1260 |                              |
| hOA | rs13300602  | 9  | 129,412,938 | LMX1B        | G  | A | 0.45 | 0.07  | 0.01 | 1.65x10 <sup>-09</sup> | 958  |                              |
| hOA | rs1835323   | 2  | 43,512,130  | THADA        | T  | C | 0.34 | -0.07 | 0.01 | 4.56x10 <sup>-08</sup> | 868  |                              |
| hOA | rs1913707   | 4  | 13,039,440  | TAPT1-AS1    | G  | A | 0.39 | -0.08 | 0.01 | 2.96x10 <sup>-11</sup> | 1203 |                              |
| hOA | rs2396502   | 6  | 45,357,699  | RUNX2        | C  | A | 0.6  | 0.08  | 0.01 | 2.12x10 <sup>-12</sup> | 1214 |                              |
| hOA | rs2785988   | 1  | 219,744,138 | RP11-95P13.2 | A  | C | 0.3  | 0.08  | 0.01 | 7.30x10 <sup>-11</sup> | 1062 |                              |
| hOA | rs2836618   | 21 | 4,004,8295  | PCP4         | A  | G | 0.26 | 0.09  | 0.01 | 3.20x10 <sup>-11</sup> | 1231 |                              |
| hOA | rs2929451   | 8  | 9,085,295   | RP11-10A14.8 | T  | A | 0.51 | -0.07 | 0.01 | 3.11x10 <sup>-09</sup> | 967  |                              |
| hOA | rs34687269  | 9  | 119,484,132 | ASTN2        | T  | A | 0.47 | -0.08 | 0.01 | 1.67x10 <sup>-12</sup> | 1260 |                              |
| hOA | rs3774355   | 3  | 52,817,778  | ITIH1        | A  | G | 0.36 | 0.09  | 0.01 | 8.20x10 <sup>-14</sup> | 1476 | Body mass index <sup>a</sup> |
| (-) |             |    |             |              |    |   |      |       |      |                        |      |                              |
| hOA | rs4252548   | 19 | 55,879,672  | IL11         | T  | C | 0.02 | 0.28  | 0.04 | 1.96x10 <sup>-12</sup> | 1214 |                              |
| hOA | rs4338381   | 1  | 103,572,927 | COL11A1      | G  | A | 0.37 | -0.1  | 0.01 | 4.37x10 <sup>-15</sup> | 1845 |                              |
| hOA | rs60890741  | 8  | 130,768,503 | GSDMC        | CA | C | 0.14 | -0.11 | 0.02 | 4.50x10 <sup>-09</sup> | 1151 |                              |
| hOA | rs62063281  | 17 | 44,038,785  | MAPT         | G  | A | 0.22 | 0.1   | 0.01 | 5.30x10 <sup>-12</sup> | 1356 |                              |
| hOA | rs7222178   | 17 | 59,652,282  | NACA2        | A  | T | 0.2  | 0.1   | 0.01 | 3.77x10 <sup>-11</sup> | 1264 |                              |

|     |            |    |             |            |    |   |      |       |      |                        |      |                                        |
|-----|------------|----|-------------|------------|----|---|------|-------|------|------------------------|------|----------------------------------------|
| hOA | rs74767794 | 1  | 184006128   | COLGALT2   | G  | A | 0.32 | -0.08 | 0.01 | 2.56x10 <sup>-09</sup> | 1100 | Whole body fat mass <sup>a</sup>       |
| (-) |            |    |             |            |    |   |      |       |      |                        |      |                                        |
| hOA | rs7571789  | 2  | 7,071,4793  | TGFA       | C  | T | 0.52 | -0.09 | 0.01 | 3.26x10 <sup>-14</sup> | 1599 |                                        |
| hOA | rs79056043 | 12 | 59,289,598  | LRIG3      | G  | A | 0.05 | 0.16  | 0.03 | 1.33x10 <sup>-09</sup> | 960  |                                        |
| hOA | rs798748   | 4  | 1,716,770   | SLBP       | C  | T | 0.62 | 0.07  | 0.01 | 2.50x10 <sup>-09</sup> | 912  |                                        |
| hOA | rs80287694 | 6  | 55,636,940  | BMP5       | G  | A | 0.11 | 0.11  | 0.02 | 2.66x10 <sup>-09</sup> | 935  |                                        |
| kOA | rs1078301  | 9  | 116,909,146 | COL27A1    | T  | A | 0.27 | 0.07  | 0.01 | 1.27x10 <sup>-10</sup> | 780  |                                        |
| kOA | rs12470967 | 2  | 19,2671,981 | AC098872.3 | G  | A | 0.57 | -0.06 | 0.01 | 1.50x10 <sup>-08</sup> | 713  |                                        |
| kOA | rs143384   | 20 | 34,025,756  | GDF5       | G  | A | 0.4  | -0.09 | 0.01 | 4.77x10 <sup>-23</sup> | 1573 | Weight of female patients <sup>a</sup> |
| (-) |            |    |             |            |    |   |      |       |      |                        |      |                                        |
| kOA | rs17567417 | 2  | 3,343,0603  | LTBP1      | C  | G | 0.47 | -0.07 | 0.01 | 1.96x10 <sup>-12</sup> | 987  |                                        |
| kOA | rs35087650 | 17 | 2,058,349   | SMG6       | AT | A | 0.26 | 0.07  | 0.01 | 1.18x10 <sup>-09</sup> | 762  |                                        |
| kOA | rs4775006  | 15 | 58,215,727  | ALDH1A2    | A  | C | 0.41 | 0.06  | 0.01 | 8.40x10 <sup>-10</sup> | 703  |                                        |
| kOA | rs56116847 | 12 | 123,835,233 | SBNO1      | A  | G | 0.36 | 0.06  | 0.01 | 3.19x10 <sup>-10</sup> | 670  |                                        |
| kOA | rs6499244  | 16 | 69,735,271  | NFAT5      | A  | T | 0.56 | 0.06  | 0.01 | 3.88x10 <sup>-11</sup> | 716  | Body mass index <sup>a</sup> (-)       |
| kOA | rs8067763  | 17 | 70,012,939  | LINC02095  | A  | G | 0.59 | -0.06 | 0.01 | 2.39x10 <sup>-09</sup> | 703  |                                        |
| kOA | rs9277552  | 6  | 33,055,501  | HLA-DPB1   | T  | C | 0.21 | -0.06 | 0.01 | 1.97x10 <sup>-08</sup> | 482  |                                        |

<sup>a</sup>SNPs associated with confounding factors were removed after searching the Phenoscanner database (<http://www.phenoscaner.medschl.cam.ac.uk/>). <sup>b</sup>rs377807, a SNP located on the X chromosome, lacked an available proxy on the SNIIPA SNP annotator online platform (<https://snipa.helmholtz-muenchen.de/snipa3/>) and was removed from the MR analysis. (-) indicates that no proxy could be matched in the analysis. Exp, exposure; SNP, single nucleotide polymorphism; EA, effect allele; NEA, non-effect allele; EAF, effect allele frequency; SE, standard error; Chr, chromosome; UF, uterine fibroids; hOA, hip osteoarthritis; kOA, knee OA; T, Thymine; C, Cytosine; A, Adenine.
